# Supplementary material for: TRIM33 loss in multiple myeloma is associated with genomic instability and sensitivity to PARP inhibitors
Source: PubMed Central journal article supplement (PMC11021562; doi:10.1038/s41598-024-58828-8), 2024-04-16

## Full Length Westerns

Below are full length Western blots related to images presented in the main manuscript and supplementary figures. Where possible we present full length membranes, however, there are some instances where membranes were cut prior to hybridization and/or the ladder and membrane edge have not saved as part of the image.

Figure 2

### 2B Left panel (JJN3)

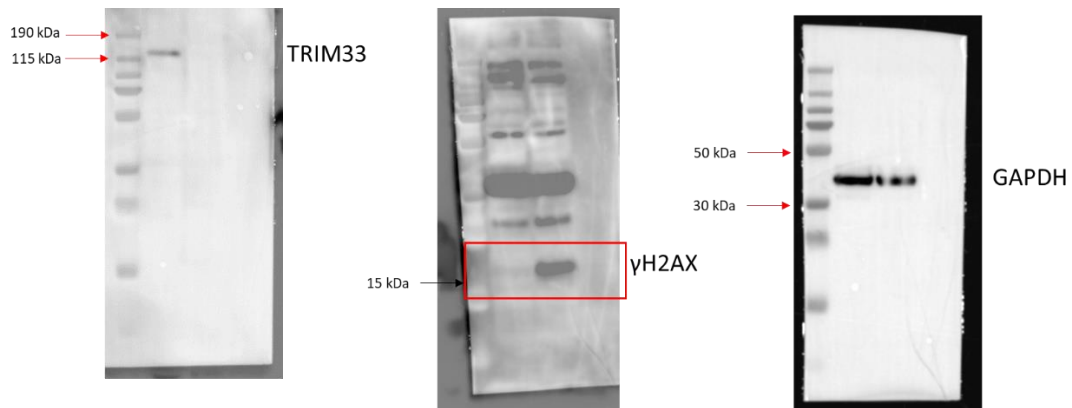

### 2B Right panel (U266)

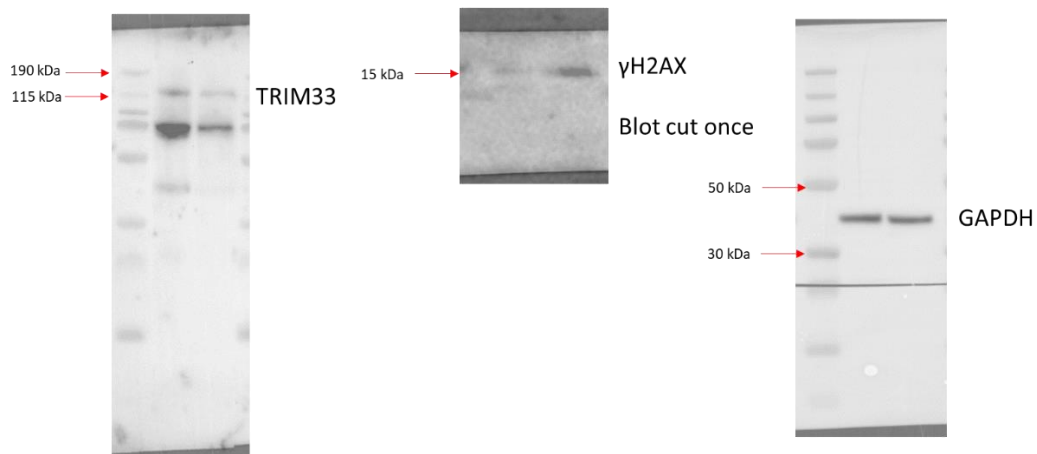

2C Left panel (JJN3)

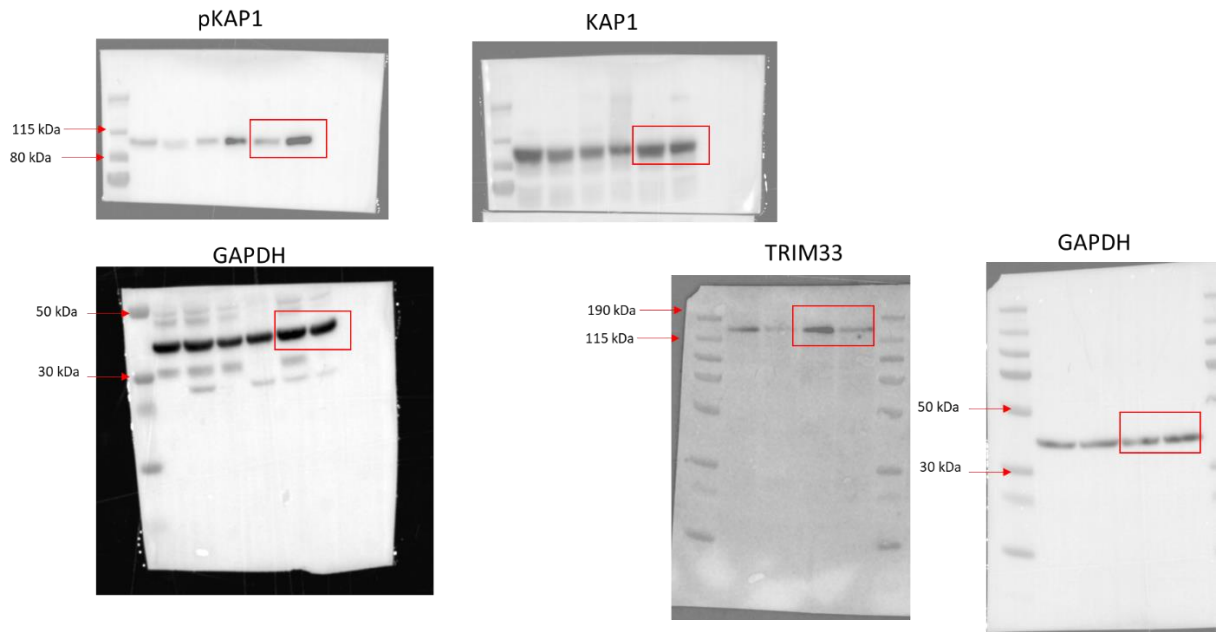

2C Right panel (U266)

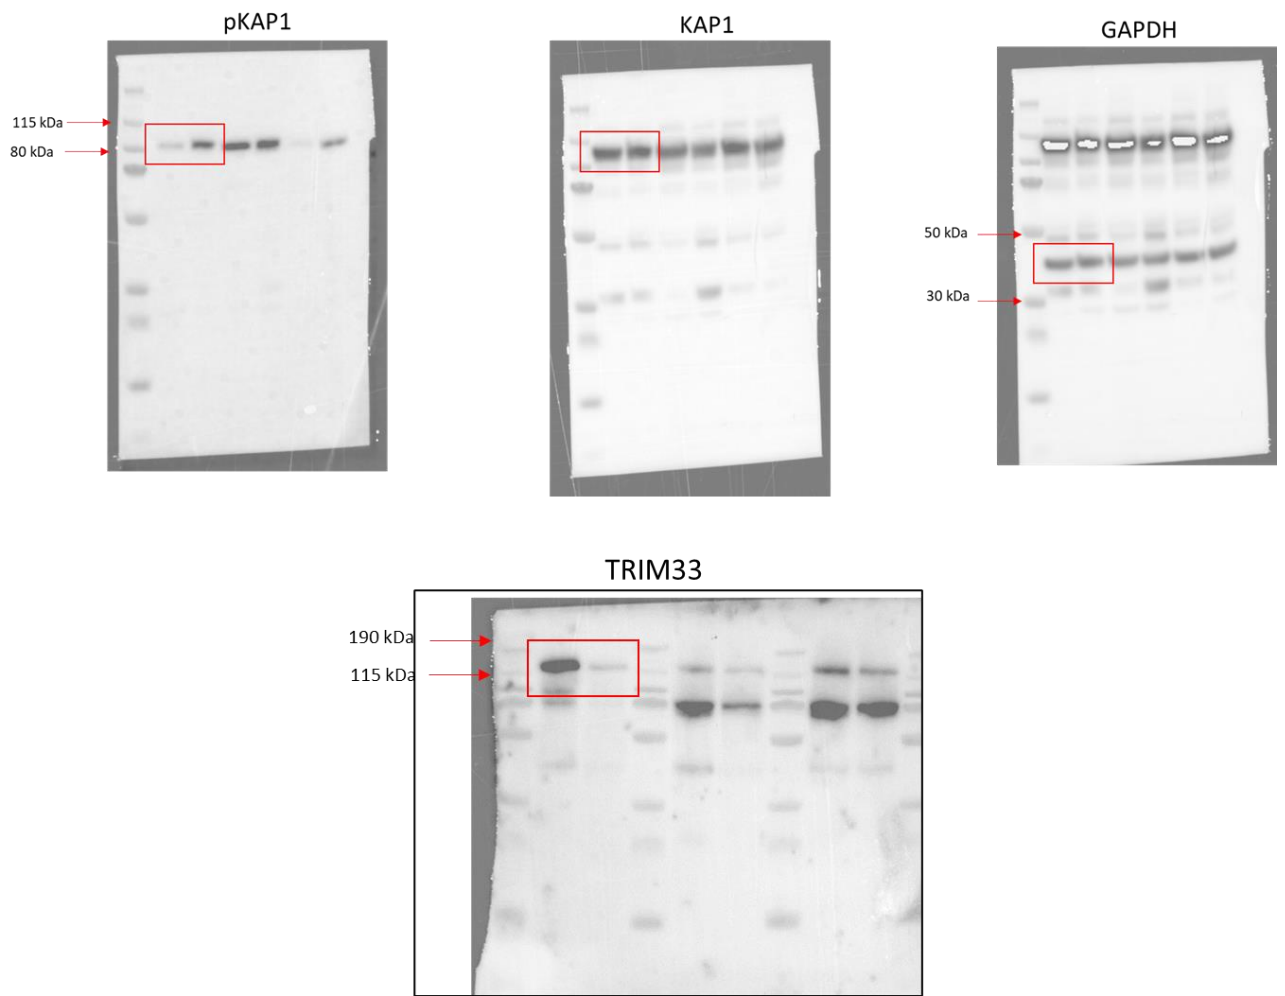

2D left panel (JN3)

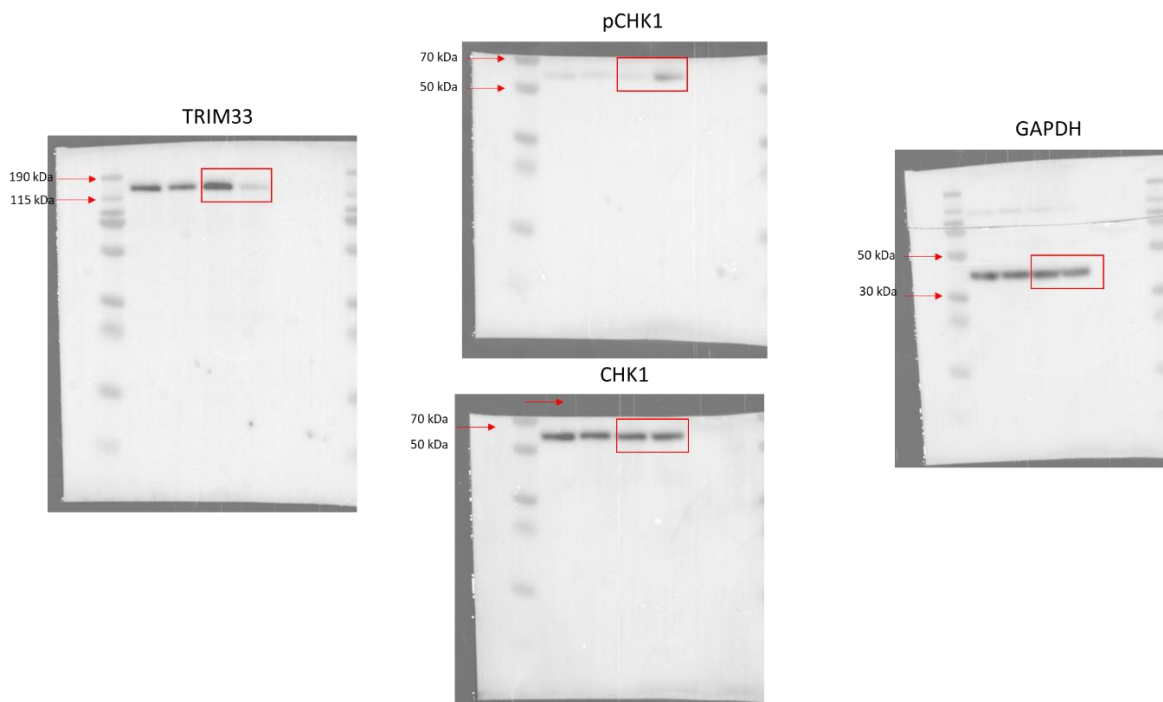

2D right panel (U266)

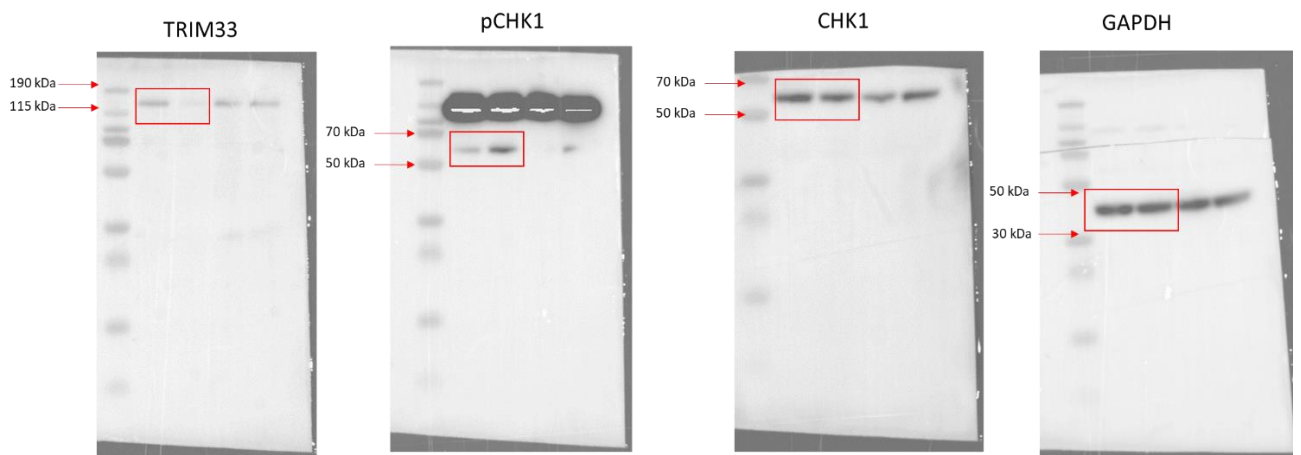

2E HR blots

Right panel (JJN3)

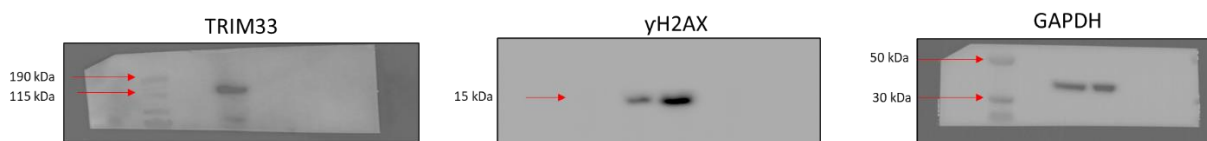

Left panel (U266)

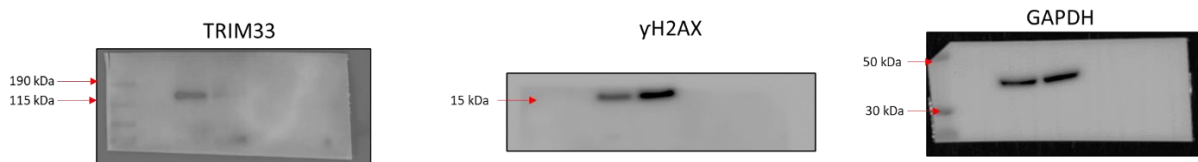

2F NHEJ blots

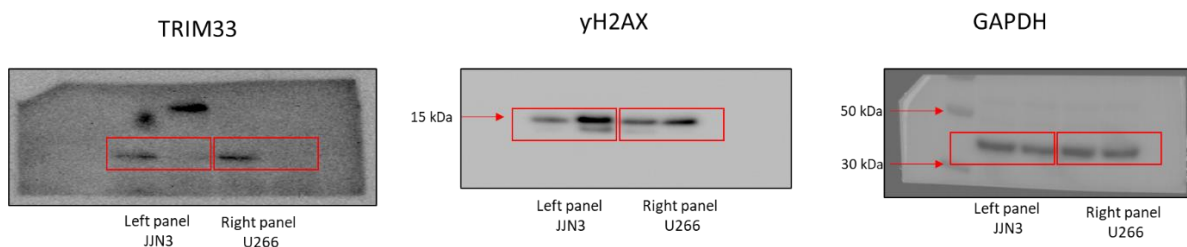

Figure 4

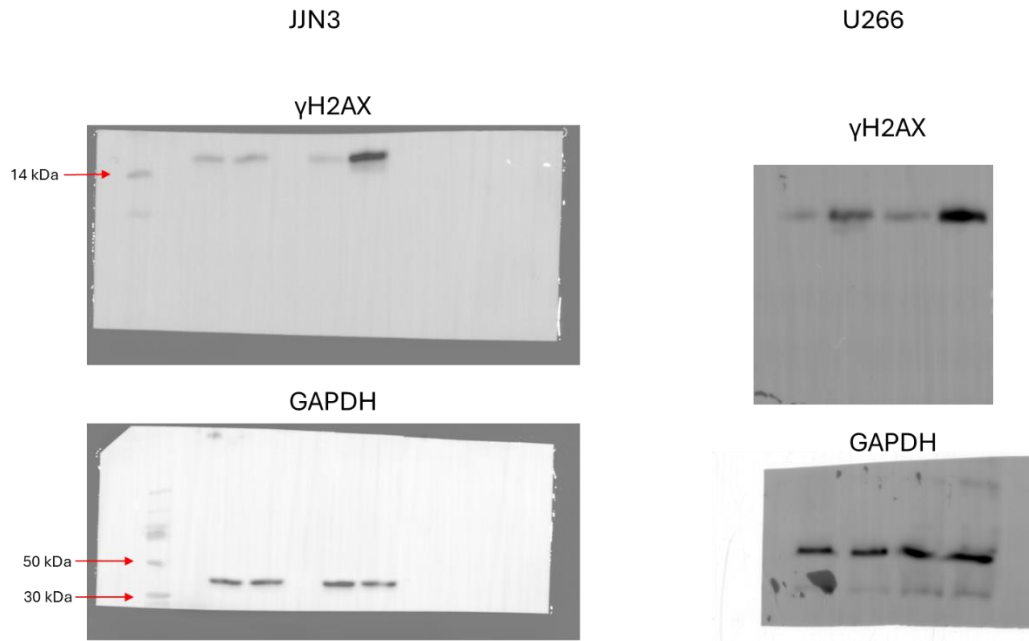

Figure 5

5A

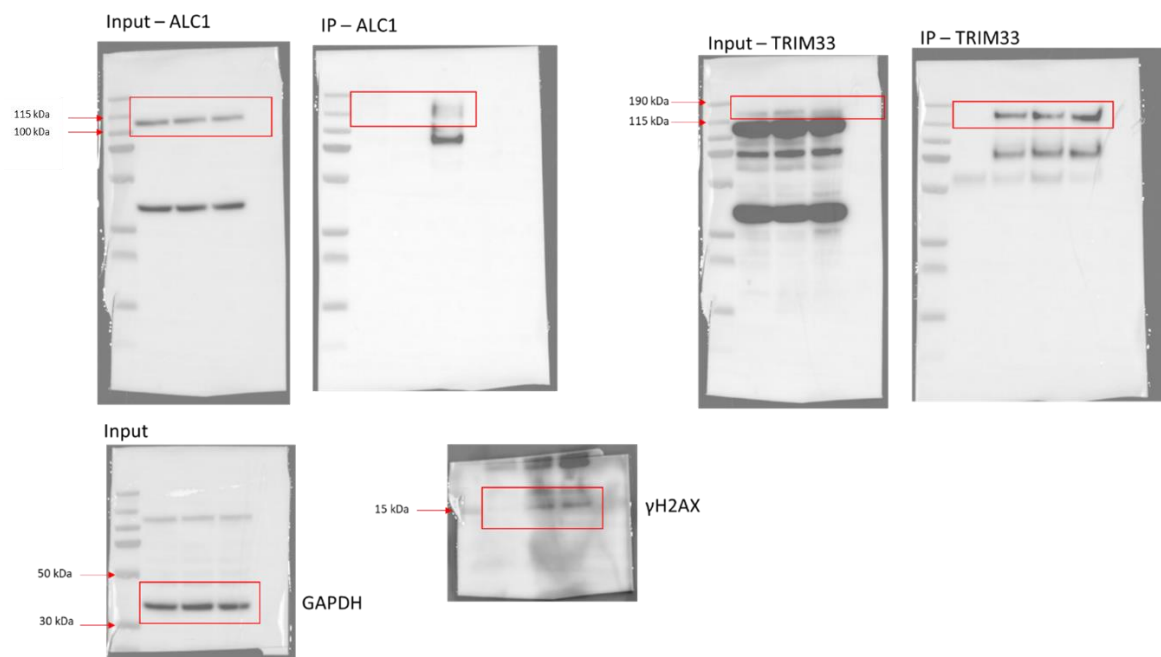

5B

ALC1

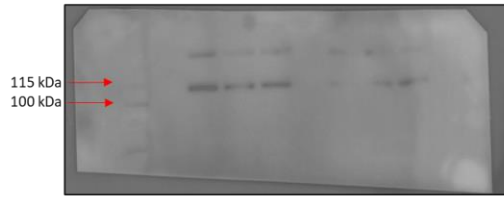

INPUT

TRIM33

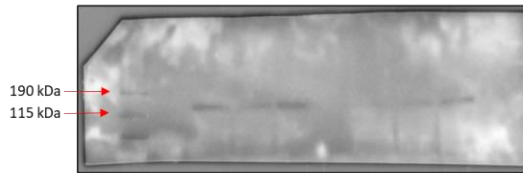

$\gamma$ H2AX

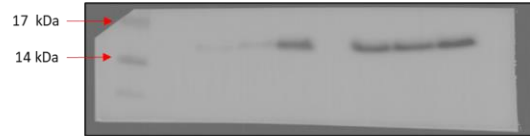

ALC1

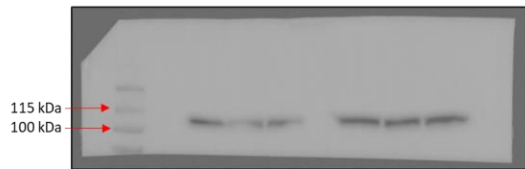

GAPDH

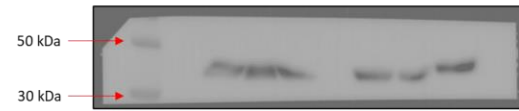

5C

K48 Linkages

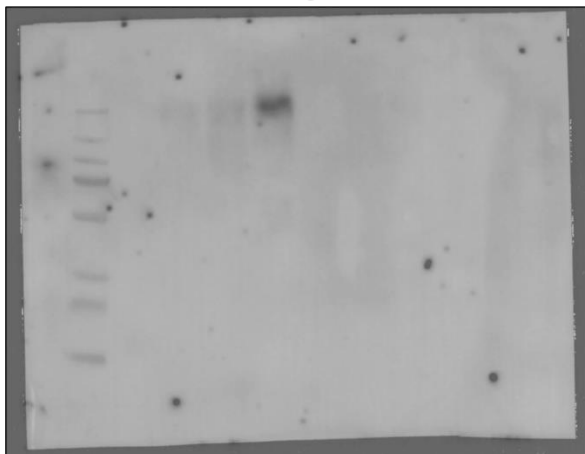

TRIM33

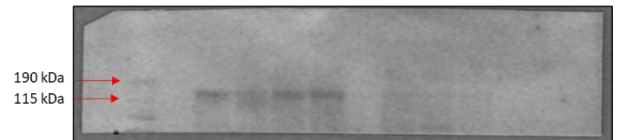

ALC1

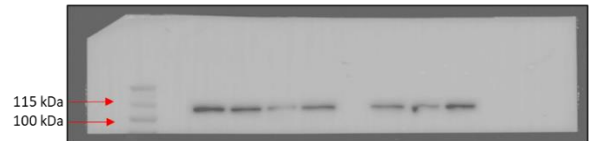

$\gamma$ H2AX

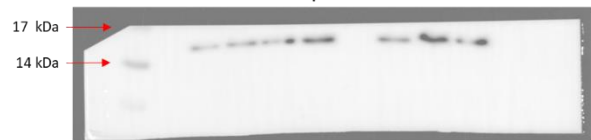

GAPDH

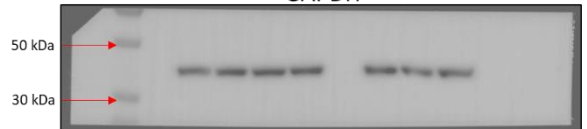



5D

TRIM33

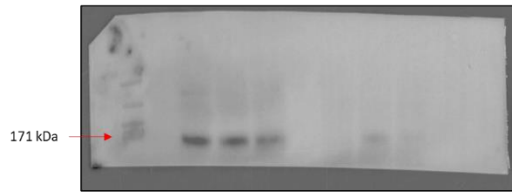

ALC1

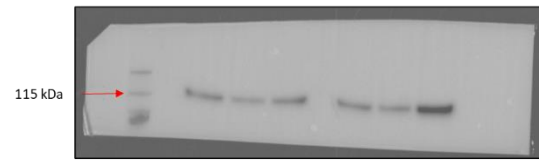

PARP1

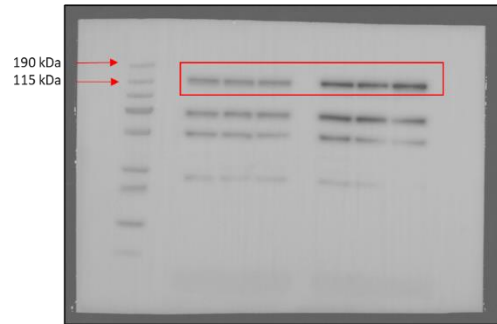

Histone H3

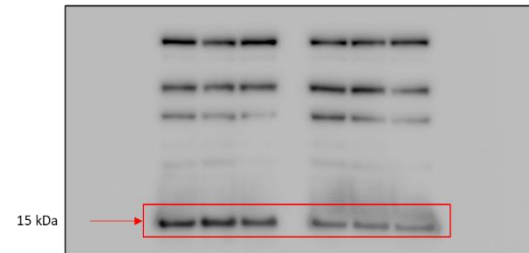

Supplementary Figure 1

Supplementary Figure 1A

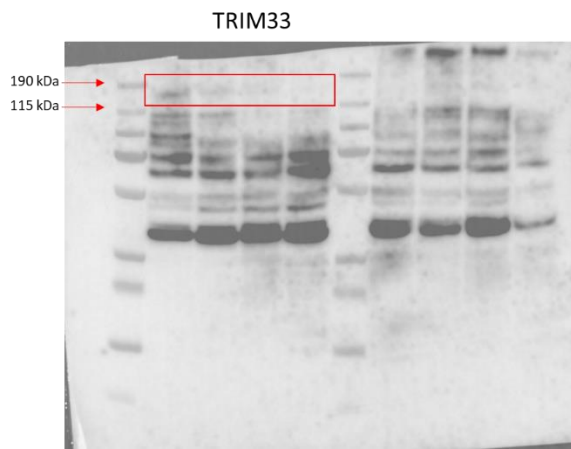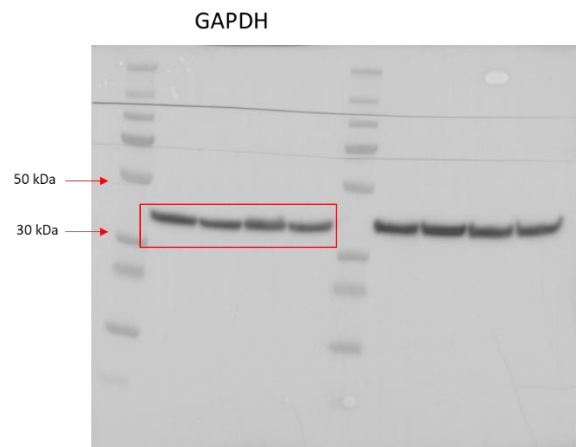

Supplementary Figure 1B

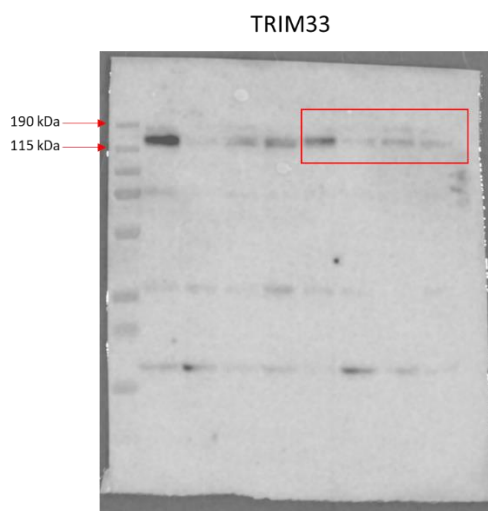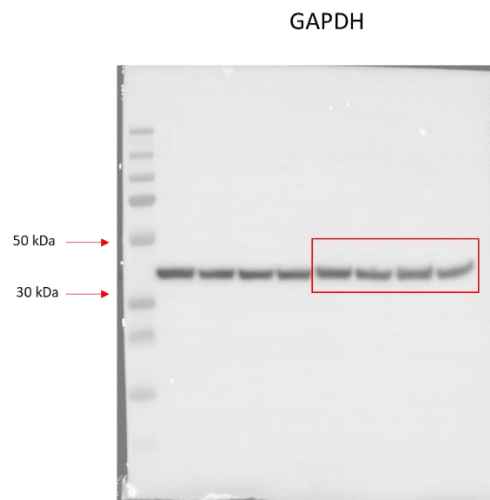

Supplementary Figure 3

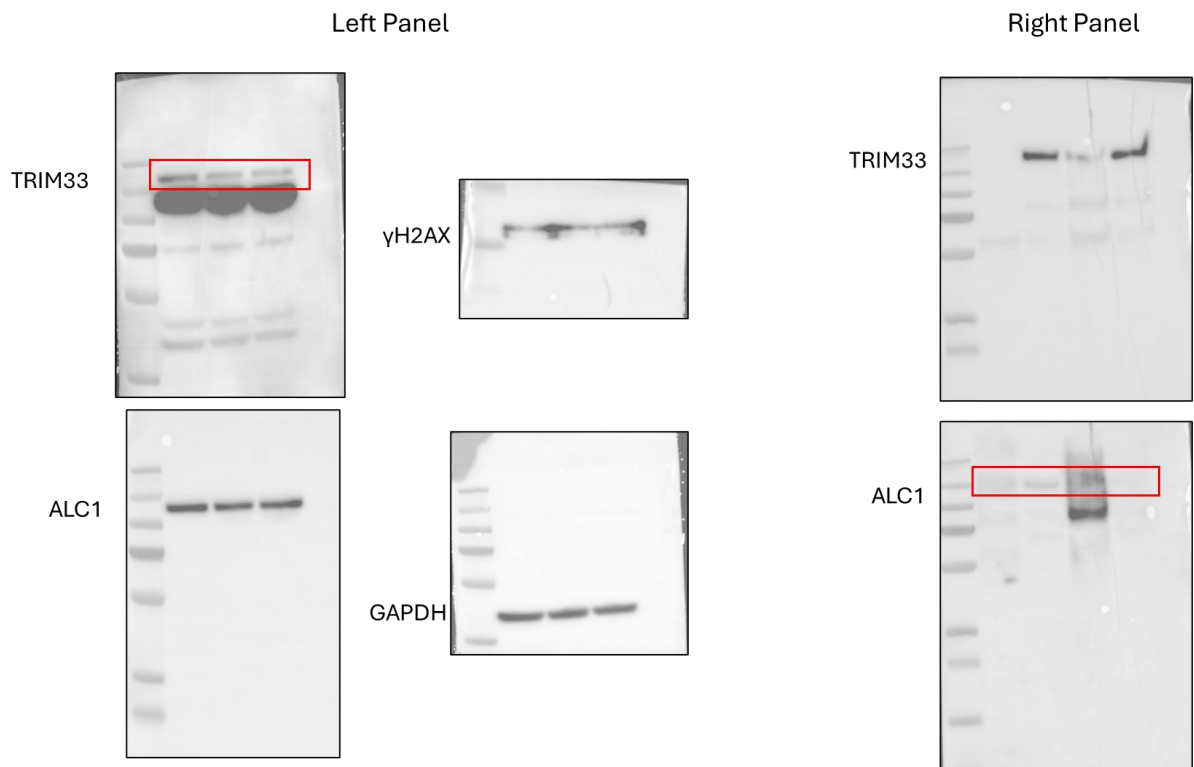

Supplement: 41598_2024_58828_MOESM1_ESM.pdf [file 41598_2024_58828_MOESM1_ESM.pdf]
